# Supplementary material for: Microbiological Safety of Raw Sheep’s Milk and Cheese Produced in Southern Brazil: An Evaluation of Enterotoxins and Antimicrobial Resistance in Isolated Staphylococcus Species
Source: Preprints.org preprint supplement (doi:10.20944/preprints202305.0929.v1), 2023-05-12
Supplement: Supplementary file 1 [file supplementary]

**Supplementary tables**

**Table S1.** Quartiles and sample counts for the milk collection farms.

| Farm 1 | | | | |
| --- | --- | --- | --- | --- |
| Quartiles | Mesophile | Total coliforms | *Escherichia coli* | *Staphylococcus aureus* |
| 0% | 7,0e+03 | 9,0e+00 | 0,0e+00 | 1,8e+03 |
| 25% | 6,1e+04 | 1,7e+01 | 0,0e+00 | 2,0e+03 |
| 50% | 7,6e+04 | 2,5e+01 | 0,0e+00 | 2,0e+03 |
| 75% | 8,7e+04 | 2,6e+01 | 2,0e+00 | 2,7e+03 |
| 100% | 9,0e+04 | 3,1e+01 | 2,1e+01 | 2,8e+03 |
| Farm 2 | | | | |
| Quartiles | Mesophile | Total coliforms | *Escherichia coli* | *Staphylococcus aureus* |
| 0% | 3,2e+04 | 3,7e+01 | 0,00E+00 | 1,0e+03 |
| 25% | 3,8e+04 | 1,7e+02 | 0,00E+00 | 1,8e+03 |
| 50% | 4,8e+04 | 1,8e+03 | 2,00E+00 | 1,9e+03 |
| 75% | 5,2e+04 | 6,1e+03 | 3,00E+00 | 3,8e+03 |
| 100% | 6,5e+04 | 7,9e+03 | 9,00E+00 | 5,3e+03 |
| Farm 3 | | | | |
| Quartiles | Mesophile | Total coliforms | *Escherichia coli* | *Staphylococcus aureus* |
| 0% | 3,0e+04 | 3,8e+02 | 7,0e+01 | 2,2e+03 |
| 25% | 3,2e+04 | 4,0e+02 | 1,3e+02 | 2,4e+03 |
| 50% | 3,3e+04 | 8,7e+02 | 1,3e+02 | 4,0e+03 |
| 75% | 3,3e+04 | 4,1e+03 | 1,9e+02 | 4,0e+03 |
| 100% | 6,0e+04 | 4,5e+03 | 1,9e+02 | 4,6e+03 |

**Table S2.** Quartiles and counts of the different cheese types.

| Feta-type | | | | |
| --- | --- | --- | --- | --- |
| Quartiles | Mesophile | Total coliforms | *Escherichia coli* | *Staphylococcus aureus* |
| 0% | 1,4e+05 | 0,0e+00 | 0,00E+00 | 0,00E+00 |
| 25% | 4,4e+05 | 0,0e+00 | 0,00E+00 | 0,00E+00 |
| 50% | 4,5e+05 | 1,9e+02 | 0,00E+00 | 0,00E+00 |
| 75% | 3,0e+06 | 2,6e+02 | 0,00E+00 | 0,00E+00 |
| 100% | 5,4e+06 | 1,5e+05 | 0,00E+00 | 0,00E+00 |
| Colonial | | | | |
| Quartiles | Mesophile | Total coliforms | *Escherichia coli* | *Staphylococcus aureus* |
| 0% | 8,3e+03 | 0,00E+00 | 0,00E+00 | 0,00E+00 |
| 25% | 3,0e+04 | 0,00E+00 | 0,00E+00 | 0,00E+00 |
| 50% | 3,4e+04 | 0,00E+00 | 0,00E+00 | 0,00E+00 |
| 75% | 1,3e+05 | 0,00E+00 | 0,00E+00 | 0,00E+00 |
| 100% | 2,9e+05 | 0,00E+00 | 0,00E+00 | 0,00E+00 |
| Fresh | | | | |
| Quartiles | Mesophile | Total coliforms | *Escherichia coli* | *Staphylococcus aureus* |
| 0% | 1,7e+05 | 8,1e+02 | 0,00e+00 | 0,0e+00 |
| 25% | 3,0e+05 | 1,2e+03 | 0,00e+00 | 1,0e+01 |
| 50% | 3,1e+05 | 1,3e+03 | 0,00e+00 | 1,8e+01 |
| 75% | 3,5e+05 | 2,4e+03 | 2,64e+02 | 6,0e+01 |
| 100% | 4,7e+05 | 3,2e+03 | 9,30e+02 | 6,4e+01 |
| Pecorino-type | | | | |
| Quartiles | Mesophile | Total coliforms | *Escherichia coli* | *Staphylococcus aureus* |
| 0% | 2,0e+05 | 0,0e+00 | 0,00E+00 | 0,0e+00 |
| 25% | 2,1e+05 | 0,0e+00 | 0,00E+00 | 0,0e+00 |
| 50% | 2,7e+05 | 1,2e+02 | 0,00E+00 | 0,0e+00 |
| 75% | 4,1e+06 | 1,1e+03 | 0,00E+00 | 0,0e+00 |
| 100% | 6,4e+06 | 2,8e+03 | 0,00E+00 | 1,5e+02 |
